# Supplementary material for: Acinetobacter baumannii strains isolated from patients in intensive care units in Goiânia, Brazil: Molecular and drug susceptibility profiles
Source: PubMed Central journal article supplement (PMC5419545; doi:10.1371/journal.pone.0176790), 2017-05-05
Supplement: pone.0176790.s001.pdf [file pone.0176790.s001.pdf]

|        |                           | Antimicrobial susceptibility test (R = resistant, S = susceptible, NT = not tested) |        |               |        |        |               |        |               |         |         |      |     |     |     |     |     |     |     |     |     |     |       |
|--------|---------------------------|-------------------------------------------------------------------------------------|--------|---------------|--------|--------|---------------|--------|---------------|---------|---------|------|-----|-----|-----|-----|-----|-----|-----|-----|-----|-----|-------|
|        | Site of sample collection | Biofilm                                                                             | OXA-23 | ISAba1/OXA-23 | OXA-40 | OXA-51 | ISAba1/OXA-51 | OXA-58 | ISAba1/OXA-58 | AMP/SUL | PIP/TAZ | CFPM | CAZ | IMP | MER | AMI | GEN | CPX | LVX | POL | TET | TGC | Death |
| ABs01  | Peritoneal fluid          | Yes                                                                                 | Yes    | No            | Yes    | No     | No            | No     | No            | R       | R       | R    | R   | R   | R   | I   | R   | R   | NT  | S   | NT  | S   | Y     |
| ABs02  | Respiratory secretion     | Yes                                                                                 | No     | No            | No     | Yes    | No            | No     | No            | R       | R       | R    | R   | R   | R   | I   | R   | R   | NT  | S   | NT  | S   | Y     |
| ABs04  | Respiratory secretion     | Yes                                                                                 | Yes    | No            | No     | Yes    | Yes           | No     | No            | R       | R       | R    | R   | R   | R   | S   | R   | R   | NT  | S   | NT  | S   | N     |
| ABs05  | Catheter                  | Yes                                                                                 | Yes    | Yes           | No     | Yes    | No            | No     | No            | R       | R       | R    | R   | R   | R   | S   | S   | R   | NT  | S   | NT  | S   | N     |
| ABs06  | Respiratory secretion     | Yes                                                                                 | Yes    | Yes           | No     | Yes    | Yes           | No     | No            | R       | R       | R    | R   | R   | R   | S   | R   | NT  | NT  | S   | NT  | S   | Y     |
| ABs07  | Pleural fluid             | Yes                                                                                 | Yes    | Yes           | No     | Yes    | Yes           | No     | No            | R       | R       | R    | R   | R   | R   | S   | S   | R   | NT  | S   | NT  | S   | Y     |
| ABs09  | Blood                     | Yes                                                                                 | No     | No            | No     | Yes    | Yes           | No     | No            | R       | R       | R    | R   | R   | R   | R   | R   | R   | R   | R   | R   | R   | Y     |
| ABs12  | Catheter                  | Yes                                                                                 | Yes    | No            | No     | Yes    | Yes           | No     | No            | R       | R       | R    | R   | R   | R   | S   | R   | R   | R   | R   | R   | R   | Y     |
| ABs14  | Blood                     | Yes                                                                                 | No     | No            | No     | Yes    | No            | No     | No            | NT      | NT      | R    | R   | S   | S   | R   | R   | R   | NT  | S   | R   | S   | Y     |
| ABs17  | Urine                     | Yes                                                                                 | Yes    | Yes           | No     | Yes    | No            | No     | No            | R       | R       | R    | R   | R   | R   | R   | R   | R   | R   | R   | R   | R   | Y     |
| ABs18  | Blood                     | Yes                                                                                 | Yes    | Yes           | No     | Yes    | No            | No     | No            | R       | R       | R    | R   | R   | R   | R   | R   | R   | R   | R   | R   | S   | N     |
| ABs20  | Blood                     | Yes                                                                                 | No     | No            | No     | Yes    | No            | No     | No            | R       | R       | R    | R   | R   | R   | S   | S   | R   | R   | S   | R   | S   | Y     |
| ABs22  | Urine                     | Yes                                                                                 | No     | No            | No     | Yes    | No            | No     | No            | S       | S       | R    | R   | S   | S   | S   | R   | R   | S   | R   | S   | Y   |       |
| ABs23  | Respiratory secretion     | Yes                                                                                 | Yes    | Yes           | No     | Yes    | No            | No     | No            | NT      | NT      | R    | R   | R   | R   | S   | S   | R   | NT  | S   | R   | S   | Y     |
| ABs24  | Respiratory secretion     | Yes                                                                                 | Yes    | Yes           | No     | Yes    | Yes           | No     | No            | R       | R       | R    | R   | R   | R   | S   | R   | R   | NT  | S   | NT  | S   | Y     |
| ABs26  | Respiratory secretion     | Yes                                                                                 | No     | No            | No     | Yes    | No            | No     | No            | R       | R       | R    | R   | R   | R   | S   | R   | R   | NT  | S   | NT  | S   | Y     |
| ABs27  | Respiratory secretion     | Yes                                                                                 | No     | No            | No     | Yes    | No            | No     | No            | R       | R       | R    | R   | R   | R   | S   | S   | R   | NT  | S   | NT  | S   | Y     |
| ABs28  | Urine                     | Yes                                                                                 | Yes    | Yes           | No     | Yes    | Yes           | No     | No            | R       | R       | R    | R   | R   | R   | S   | S   | R   | R   | S   | NT  | S   | Y     |
| ABs29  | Skin                      | Yes                                                                                 | Yes    | Yes           | No     | Yes    | No            | No     | No            | R       | R       | R    | R   | R   | R   | I   | R   | R   | NT  | S   | NT  | S   | N     |
| ABs30  | Respiratory secretion     | Yes                                                                                 | Yes    | Yes           | No     | Yes    | Yes           | No     | No            | R       | R       | R    | R   | R   | R   | S   | R   | R   | NT  | S   | NT  | S   | Y     |
| ABs31  | Peritoneal fluid          | Yes                                                                                 | Yes    | Yes           | No     | Yes    | Yes           | No     | No            | R       | R       | R    | R   | R   | R   | S   | R   | R   | NT  | S   | NT  | S   | Y     |
| ABs33  | Respiratory secretion     | No                                                                                  | Yes    | Yes           | No     | Yes    | No            | No     | No            | R       | R       | R    | R   | R   | R   | S   | R   | R   | NT  | S   | NT  | S   | Y     |
| ABs34  | Blood                     | Yes                                                                                 | Yes    | Yes           | No     | Yes    | No            | No     | No            | S       | R       | R    | R   | R   | S   | S   | R   | R   | R   | S   | R   | S   | Y     |
| ABs35  | Blood                     | No                                                                                  | Yes    | Yes           | No     | Yes    | No            | No     | No            | S       | R       | R    | R   | R   | R   | S   | R   | R   | R   | R   | R   | R   | Y     |
| ABs37  | Catheter                  | No                                                                                  | Yes    | Yes           | No     | Yes    | No            | No     | No            | R       | R       | R    | R   | R   | R   | S   | R   | I   | S   | NT  | S   | Y   |       |
| ABs38  | Respiratory secretion     | Yes                                                                                 | Yes    | No            | No     | Yes    | No            | No     | No            | NT      | NT      | R    | R   | R   | R   | S   | S   | R   | NT  | S   | S   | Y   |       |
| ABs39  | Blood                     | No                                                                                  | No     | No            | No     | Yes    | No            | No     | No            | NT      | NT      | R    | R   | R   | R   | S   | S   | R   | NT  | S   | S   | Y   |       |
| ABs40  | Respiratory secretion     | No                                                                                  | Yes    | Yes           | No     | Yes    | No            | No     | No            | NT      | NT      | R    | R   | R   | R   | S   | S   | NT  | NT  | S   | S   | N   |       |
| ABs41  | secreção ferida operada   | Yes                                                                                 | Yes    | Yes           | No     | Yes    | No            | No     | No            | R       | R       | R    | R   | R   | R   | S   | R   | R   | NT  | S   | NT  | S   | N     |
| ABs42  | Blood                     | Yes                                                                                 | No     | No            | No     | Yes    | No            | No     | No            | R       | R       | R    | R   | R   | S   | S   | S   | R   | NT  | NT  | NT  | Y   |       |
| ABs43  | Respiratory secretion     | No                                                                                  | Yes    | Yes           | No     | Yes    | No            | No     | No            | R       | R       | R    | R   | R   | R   | R   | R   | R   | I   | S   | R   | S   | Y     |
| ABs45  | Respiratory secretion     | Yes                                                                                 | Yes    | Yes           | No     | Yes    | No            | No     | No            | R       | R       | R    | R   | R   | R   | S   | S   | R   | S   | R   | S   | Y   |       |
| ABs48  | Respiratory secretion     | Yes                                                                                 | No     | No            | No     | Yes    | No            | No     | No            | S       | S       | R    | R   | S   | S   | R   | R   | R   | S   | R   | S   | Y   |       |
| ABs49  | Catheter                  | Yes                                                                                 | No     | No            | No     | Yes    | Yes           | No     | No            | S       | R       | R    | R   | R   | S   | S   | S   | R   | R   | S   | R   | S   | Y     |
| ABs50  | Respiratory secretion     | Yes                                                                                 | No     | No            | No     | Yes    | No            | No     | No            | S       | S       | R    | S   | S   | S   | S   | S   | S   | S   | R   | S   | N   |       |
| ABs51  | Catheter                  | Yes                                                                                 | No     | No            | No     | Yes    | No            | Yes    | No            | S       | S       | R    | R   | R   | R   | R   | R   | R   | R   | S   | R   | S   | N     |
| ABs52  | Urine                     | Yes                                                                                 | Yes    | Yes           | No     | Yes    | No            | No     | No            | R       | R       | R    | R   | R   | R   | S   | S   | R   | R   | S   | R   | S   | Y     |
| ABs53  | Respiratory secretion     | Yes                                                                                 | No     | No            | No     | Yes    | No            | No     | No            | S       | S       | S    | S   | S   | S   | S   | S   | S   | S   | S   | S   | Y   |       |
| ABs54  | Respiratory secretion     | Yes                                                                                 | Yes    | Yes           | No     | Yes    | No            | No     | No            | R       | R       | R    | R   | R   | R   | S   | S   | R   | S   | R   | S   | Y   |       |
| ABs55  | Blood                     | Yes                                                                                 | Yes    | Yes           | No     | Yes    | No            | No     | No            | R       | R       | R    | R   | R   | R   | S   | S   | R   | I   | S   | R   | S   | Y     |
| ABs56  | Blood                     | No                                                                                  | Yes    | Yes           | No     | Yes    | No            | No     | No            | NT      | NT      | R    | R   | R   | R   | S   | S   | R   | NT  | S   | R   | S   | Y     |
| ABs58  | Urine                     | No                                                                                  | Yes    | Yes           | No     | Yes    | No            | No     | No            | NT      | NT      | R    | R   | R   | R   | NT  | R   | R   | NT  | S   | R   | S   | Y     |
| ABs61  | Blood                     | No                                                                                  | Yes    | Yes           | No     | Yes    | No            | No     | No            | R       | R       | R    | R   | R   | R   | S   | R   | R   | NT  | S   | NT  | S   | Y     |
| ABs62  | Catheter                  | No                                                                                  | No     | No            | No     | Yes    | Yes           | No     | No            | NT      | R       | R    | R   | R   | NT  | S   | S   | R   | R   | NT  | NT  | NT  | N     |
| ABs66  | Respiratory secretion     | Yes                                                                                 | No     | No            | No     | Yes    | Yes           | No     | No            | S       | R       | R    | R   | R   | S   | S   | S   | R   | NT  | S   | NT  | S   | Y     |
| ABs67  | Catheter                  | Yes                                                                                 | Yes    | Yes           | No     | Yes    | Yes           | No     | No            | I       | R       | R    | R   | R   | R   | S   | I   | R   | NT  | S   | NT  | S   | Y     |
| ABs71  | Catheter                  | No                                                                                  | No     | No            | No     | Yes    | No            | No     | No            | R       | R       | R    | R   | R   | R   | S   | R   | R   | NT  | S   | NT  | S   | Y     |
| ABs72  | Respiratory secretion     | Yes                                                                                 | No     | No            | No     | Yes    | No            | No     | No            | I       | R       | R    | R   | R   | R   | S   | R   | R   | NT  | S   | NT  | S   | N     |
| ABs73  | secreção ocular           | Yes                                                                                 | No     | No            | No     | Yes    | No            | No     | No            | S       | S       | R    | S   | S   | S   | S   | R   | R   | R   | NT  | R   | S   | Y     |
| ABs74  | Blood                     | No                                                                                  | No     | No            | No     | Yes    | No            | No     | No            | R       | R       | R    | R   | R   | R   | S   | S   | R   | R   | S   | R   | S   | Y     |
| ABs75  | Catheter                  | Yes                                                                                 | No     | No            | No     | Yes    | No            | No     | No            | S       | S       | S    | S   | S   | S   | NT  | S   | S   | S   | S   | S   | Y   |       |
| ABs77  | Respiratory secretion     | Yes                                                                                 | No     | No            | No     | Yes    | Yes           | No     | No            | R       | R       | R    | R   | R   | R   | S   | R   | R   | NT  | S   | NT  | S   | Y     |
| ABs78  | Respiratory secretion     | Yes                                                                                 | No     | No            | No     | Yes    | Yes           | Yes    | No            | R       | NT      | R    | R   | R   | R   | R   | R   | R   | NT  | S   | NT  | S   | Y     |
| ABs80  | Blood                     | Yes                                                                                 | Yes    | Yes           | No     | Yes    | Yes           | No     | No            | R       | NT      | R    | R   | R   | R   | S   | R   | R   | NT  | S   | NT  | S   | Y     |
| ABs81  | Respiratory secretion     | Yes                                                                                 | Yes    | Yes           | No     | Yes    | No            | No     | No            | R       | R       | R    | R   | R   | R   | R   | R   | R   | R   | S   | R   | S   | Y     |
| ABs88  | Secreção de Skin          | No                                                                                  | No     | No            | No     |        | No            | No     | No            | S       | S       | R    | R   | R   | S   | S   | S   | R   | R   | S   | S   | S   | N     |
| Total: |                           |                                                                                     |        |               |        |        |               |        |               |         |         |      |     |     |     |     |     |     |     |     |     |     |       |
|        |                           | 43                                                                                  | 32     | 29            | 0      | 55     | 17            | 2      | 0             | 34      | 39      | 54   | 52  | 43  | 43  | 12  | 32  | 51  | 20  | 5   | 24  | 4   | 45    |
|        |                           | 13                                                                                  | 24     | 27            | 56     | 0      | 39            | 54     | 56            | 12      | 8       | 2    | 4   | 12  | 13  | 39  | 23  | 3   | 48  | 6   | 50  | 11  |       |
|        |                           | 56                                                                                  | 56     | 56            | 56     | 55     | 56            | 56     | 56            | 46      | 47      | 56   | 56  | 55  | 56  | 51  | 55  | 54  | 23  | 53  | 30  | 54  | 56    |
